# Supplementary material for: Consensus tissue domain detection in spatial omics data using multiplex image labeling with regional morphology (MILWRM)
Source: PubMed Central journal article supplement (PMC11525554; doi:10.1038/s42003-024-06281-8), 2024-10-30
Supplement: 42003_2024_6281_MOESM1_ESM.pdf [file 42003_2024_6281_MOESM1_ESM.pdf]

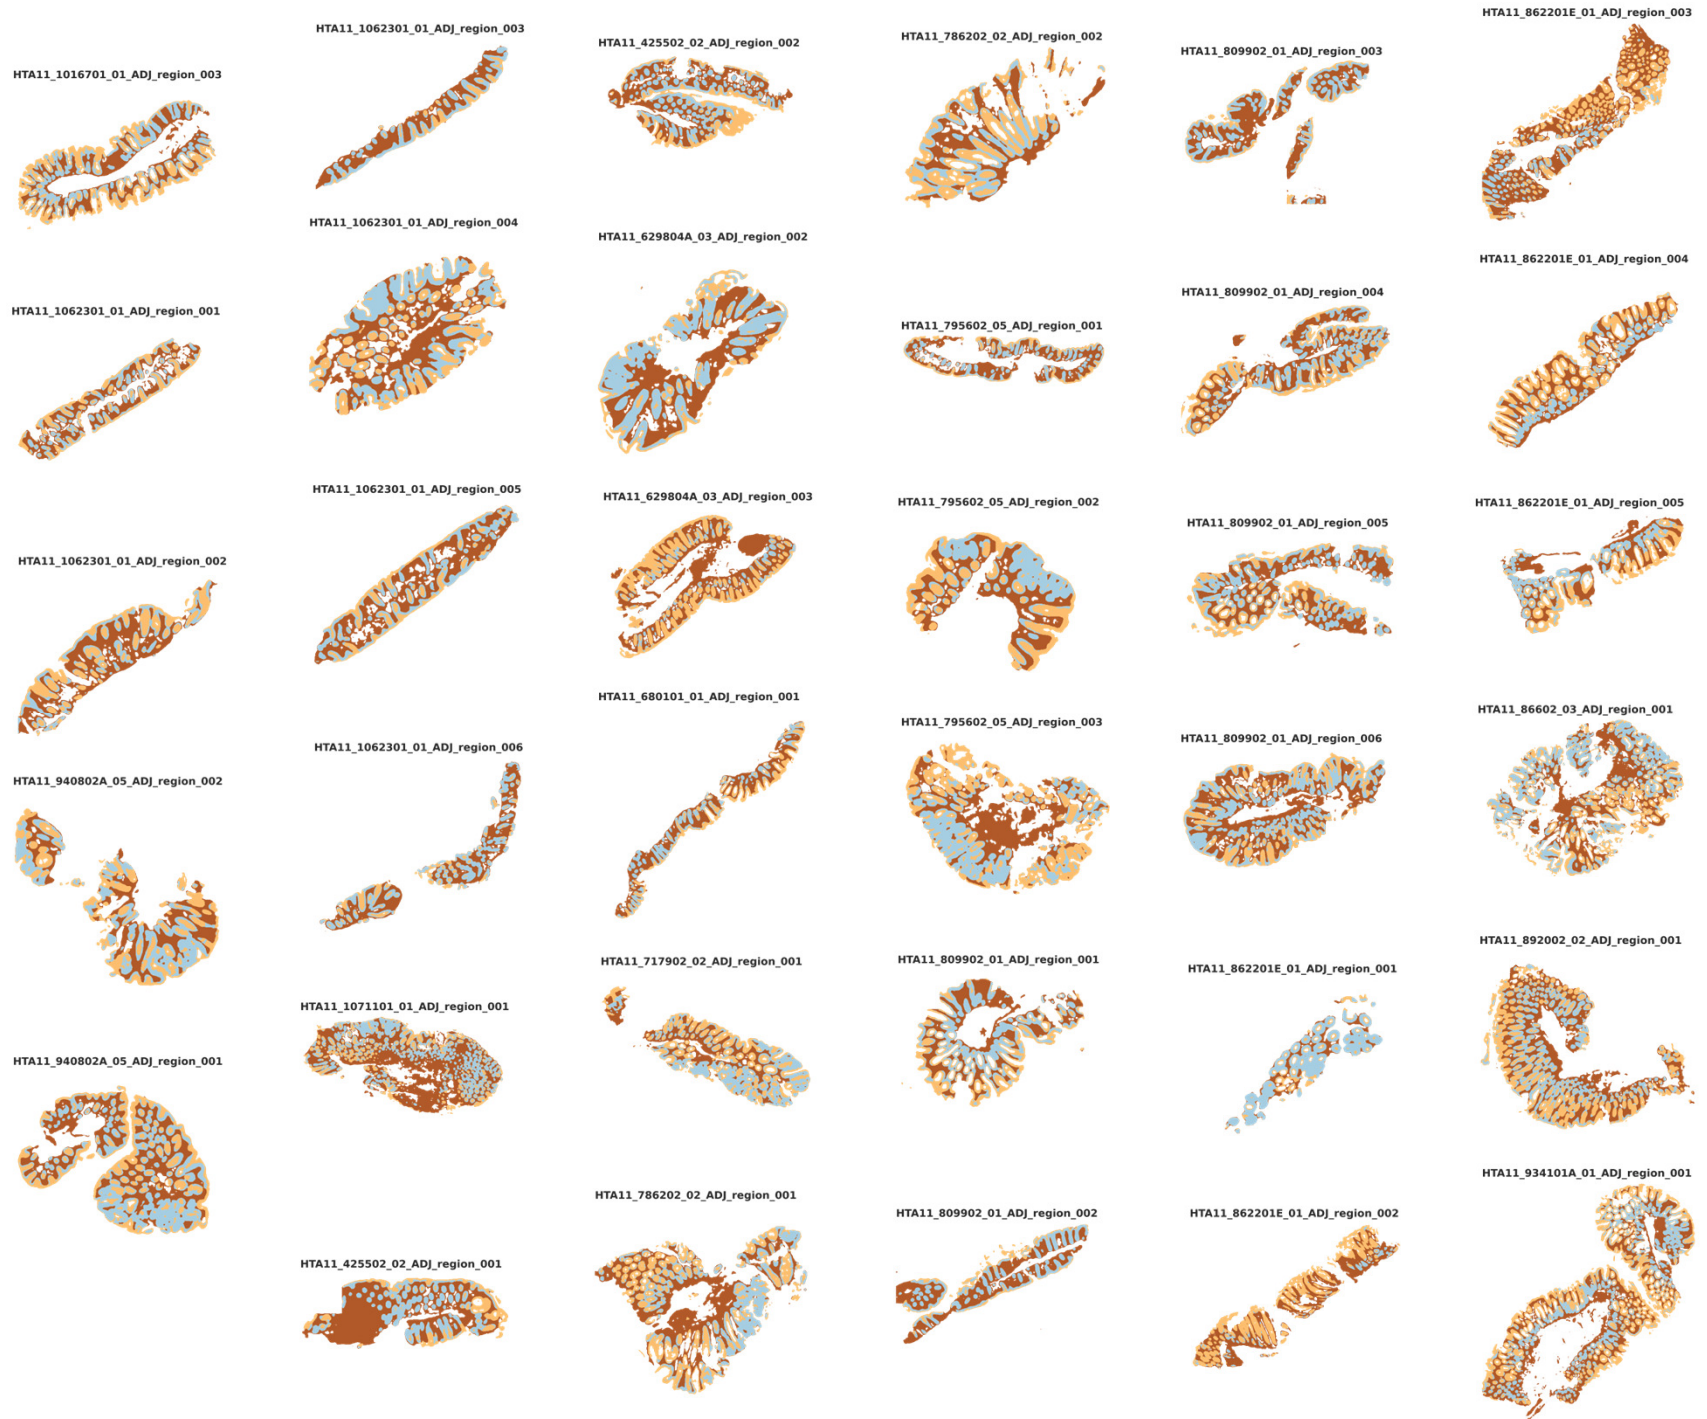

**Figure S1. Tissue domain labels for human colonic samples (alpha = 0.05).** Tissue domains for all the colonic samples (alpha = 0.05).

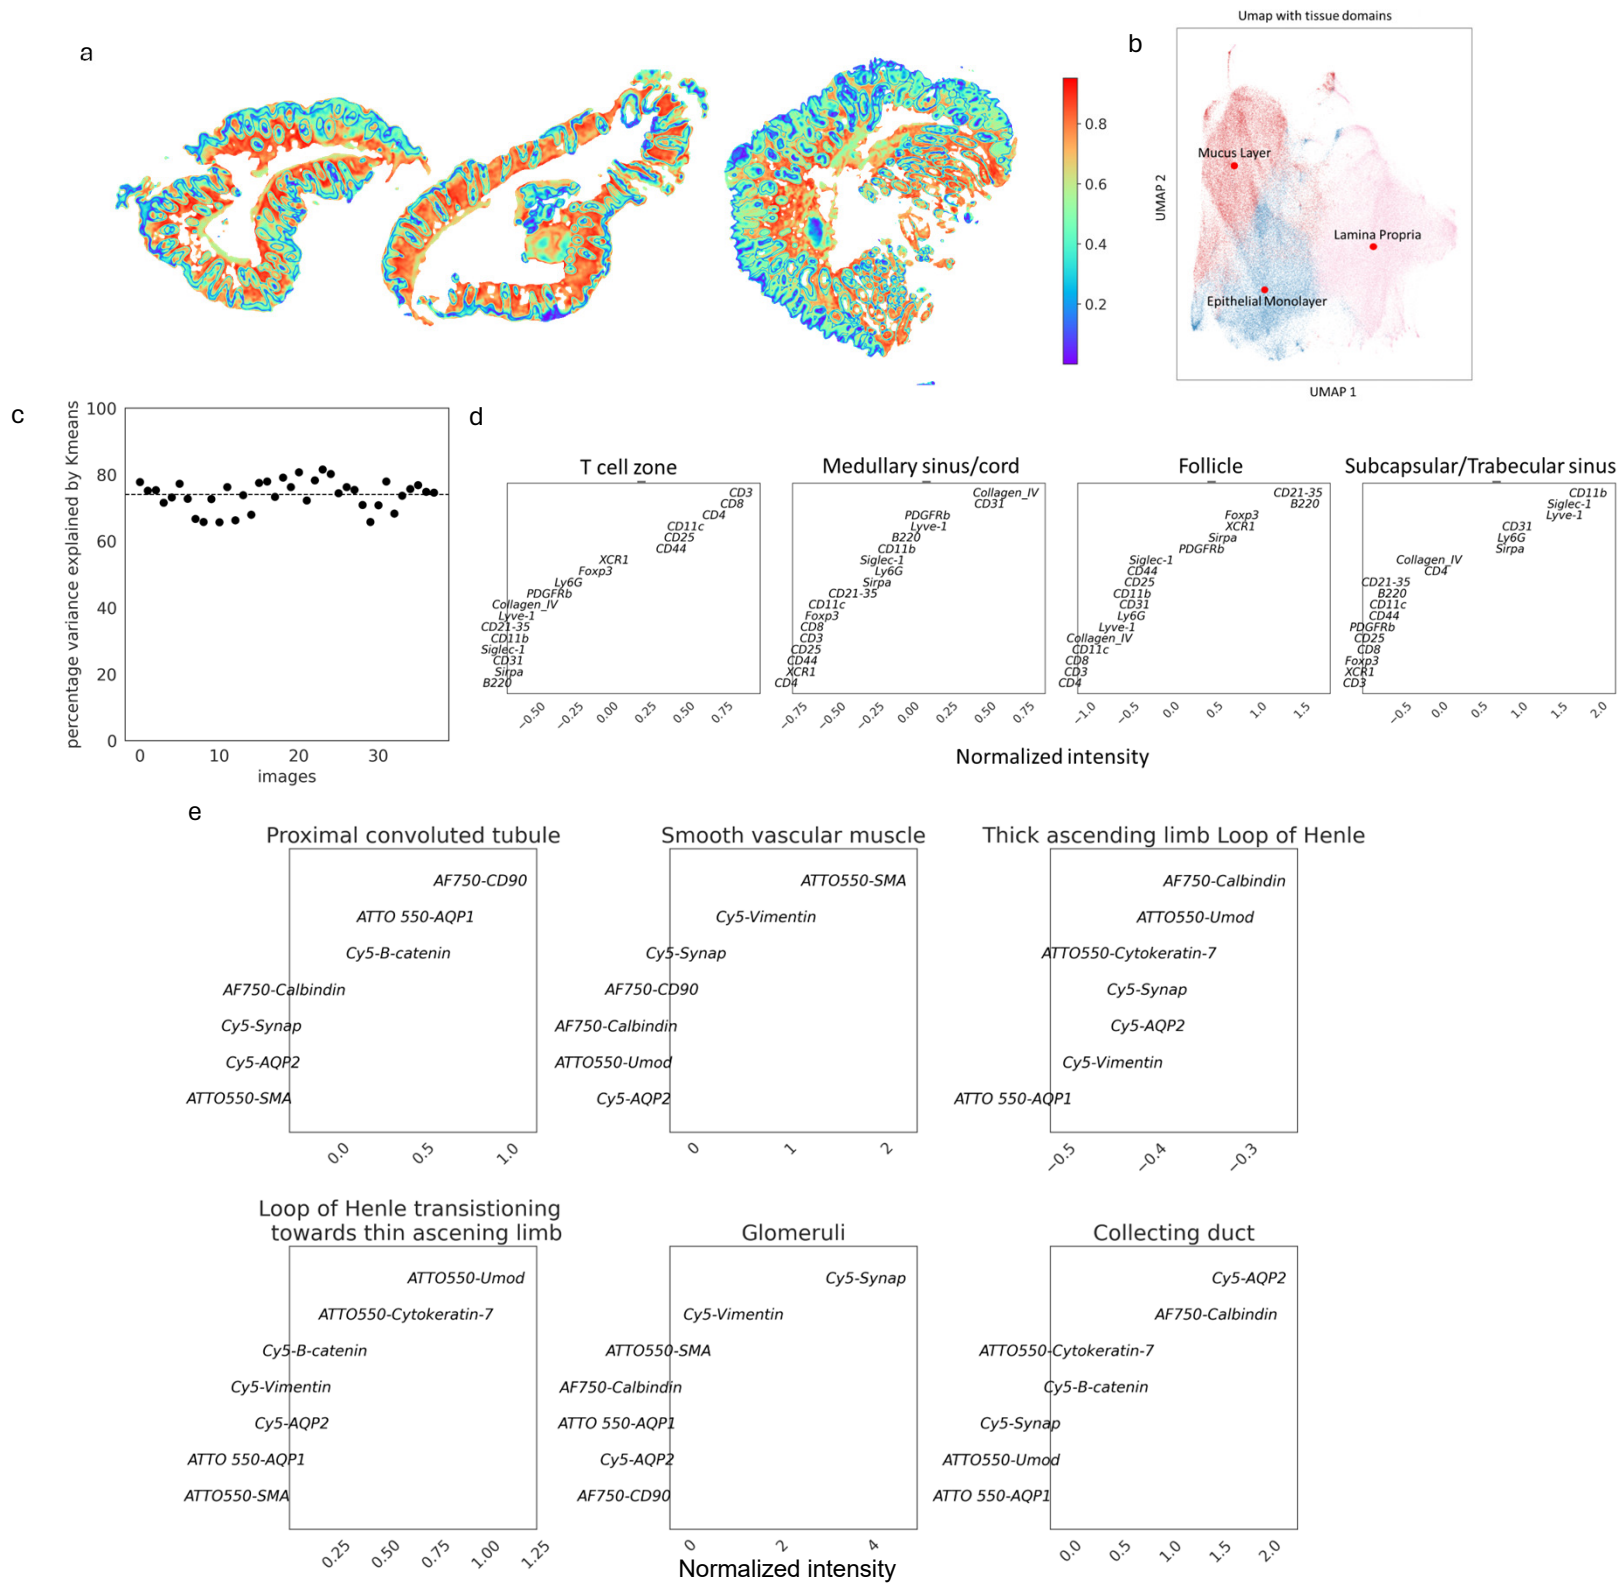

**Figure S2. MILWRM QC metrics and domain profiles on colon, lymph node, and kidney.** (a) Three representative colon mIF images with confidence score overlaid. (b) Umap of colon pixel data used for model building with tissue domain labels and centroids (different color overlays). (c) Scatter plot for percentage variance explained by the  $k$ -means model over 38 colon samples with each dot corresponding to a sample; dotted line is mean variance explained across all samples. (d) Domain profile describing marker composition of each tissue domain in the lymph node samples. (e) Domain profile describing marker composition of each tissue domain in the kidney samples.

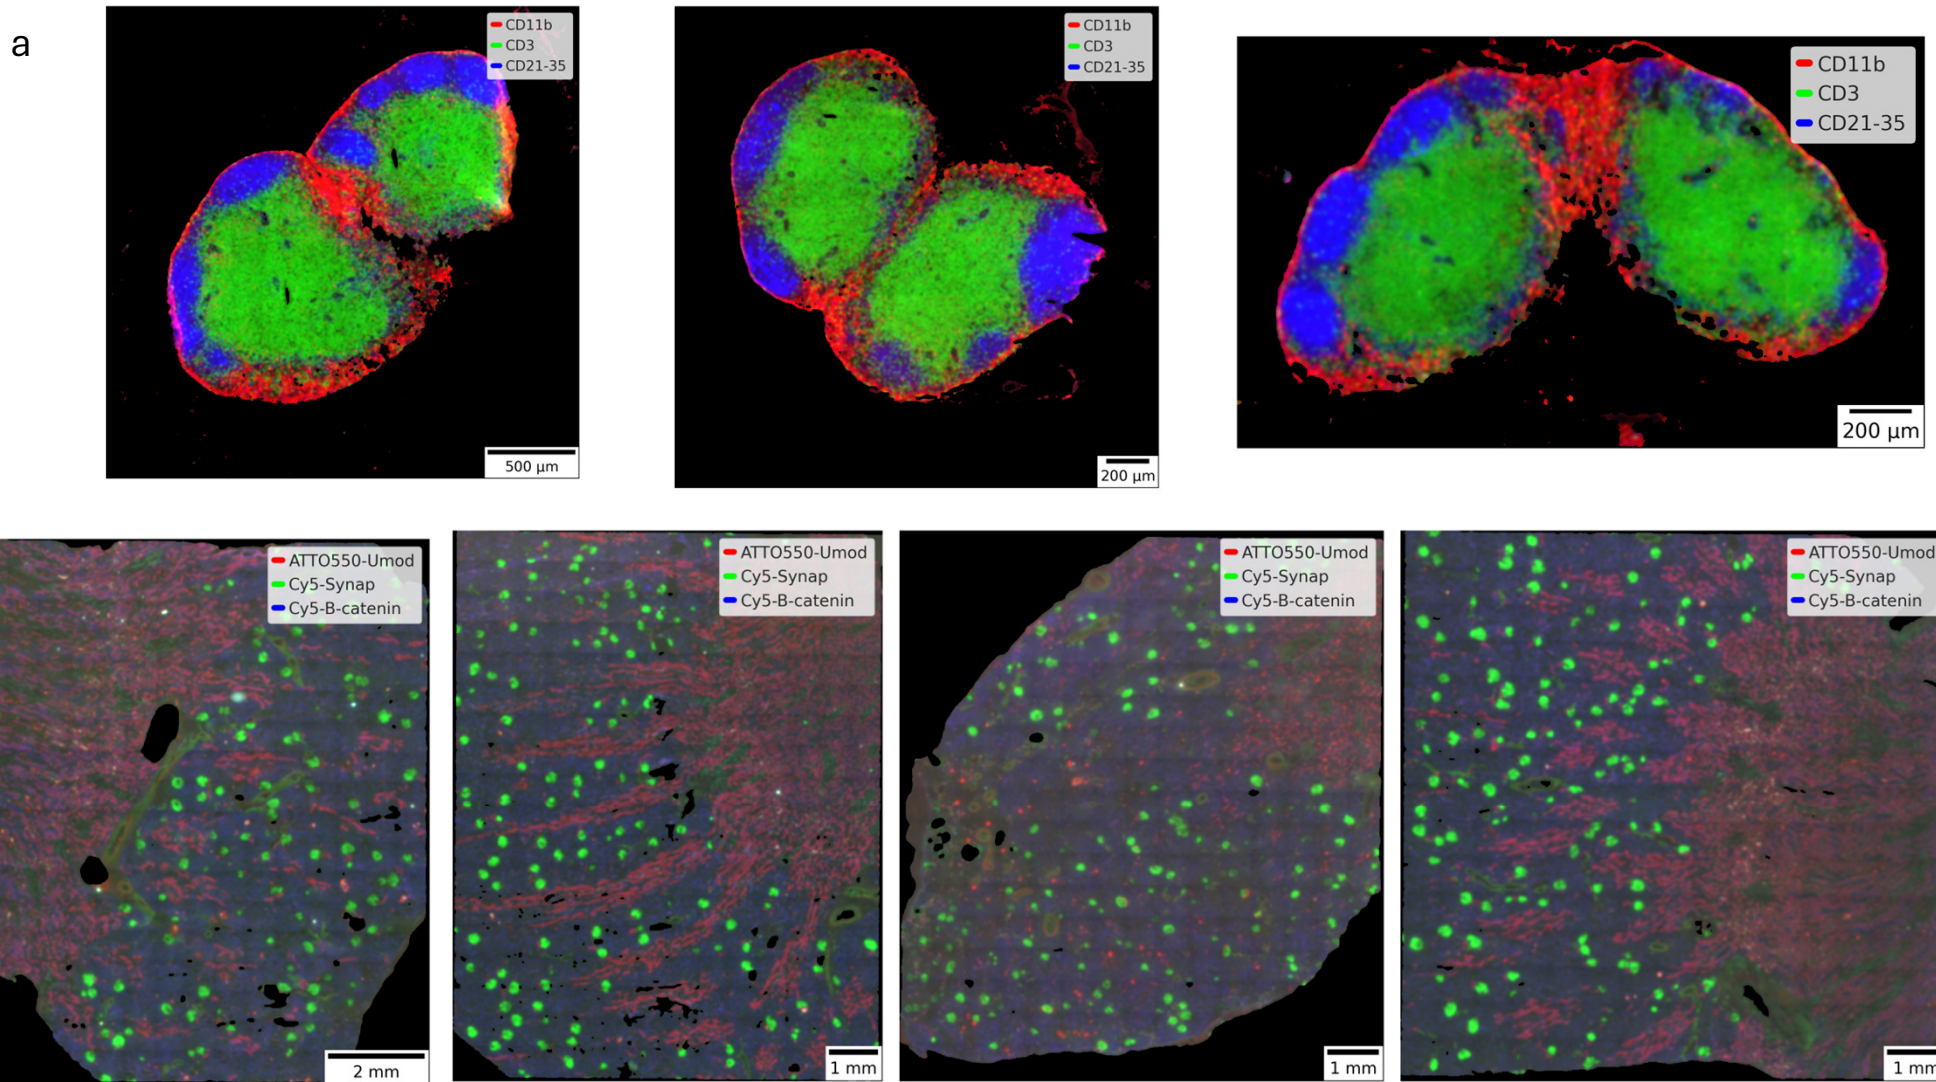

**Figure S3. Kidney and lymph node CODEX images.** (a) Lymph node CODEX images with CD11b, CD3 and CD21-35 overlaid. (b) Kidney CODEX images with Uromodulin, Synaptopodin and  $\beta$ -catenin overlaid.

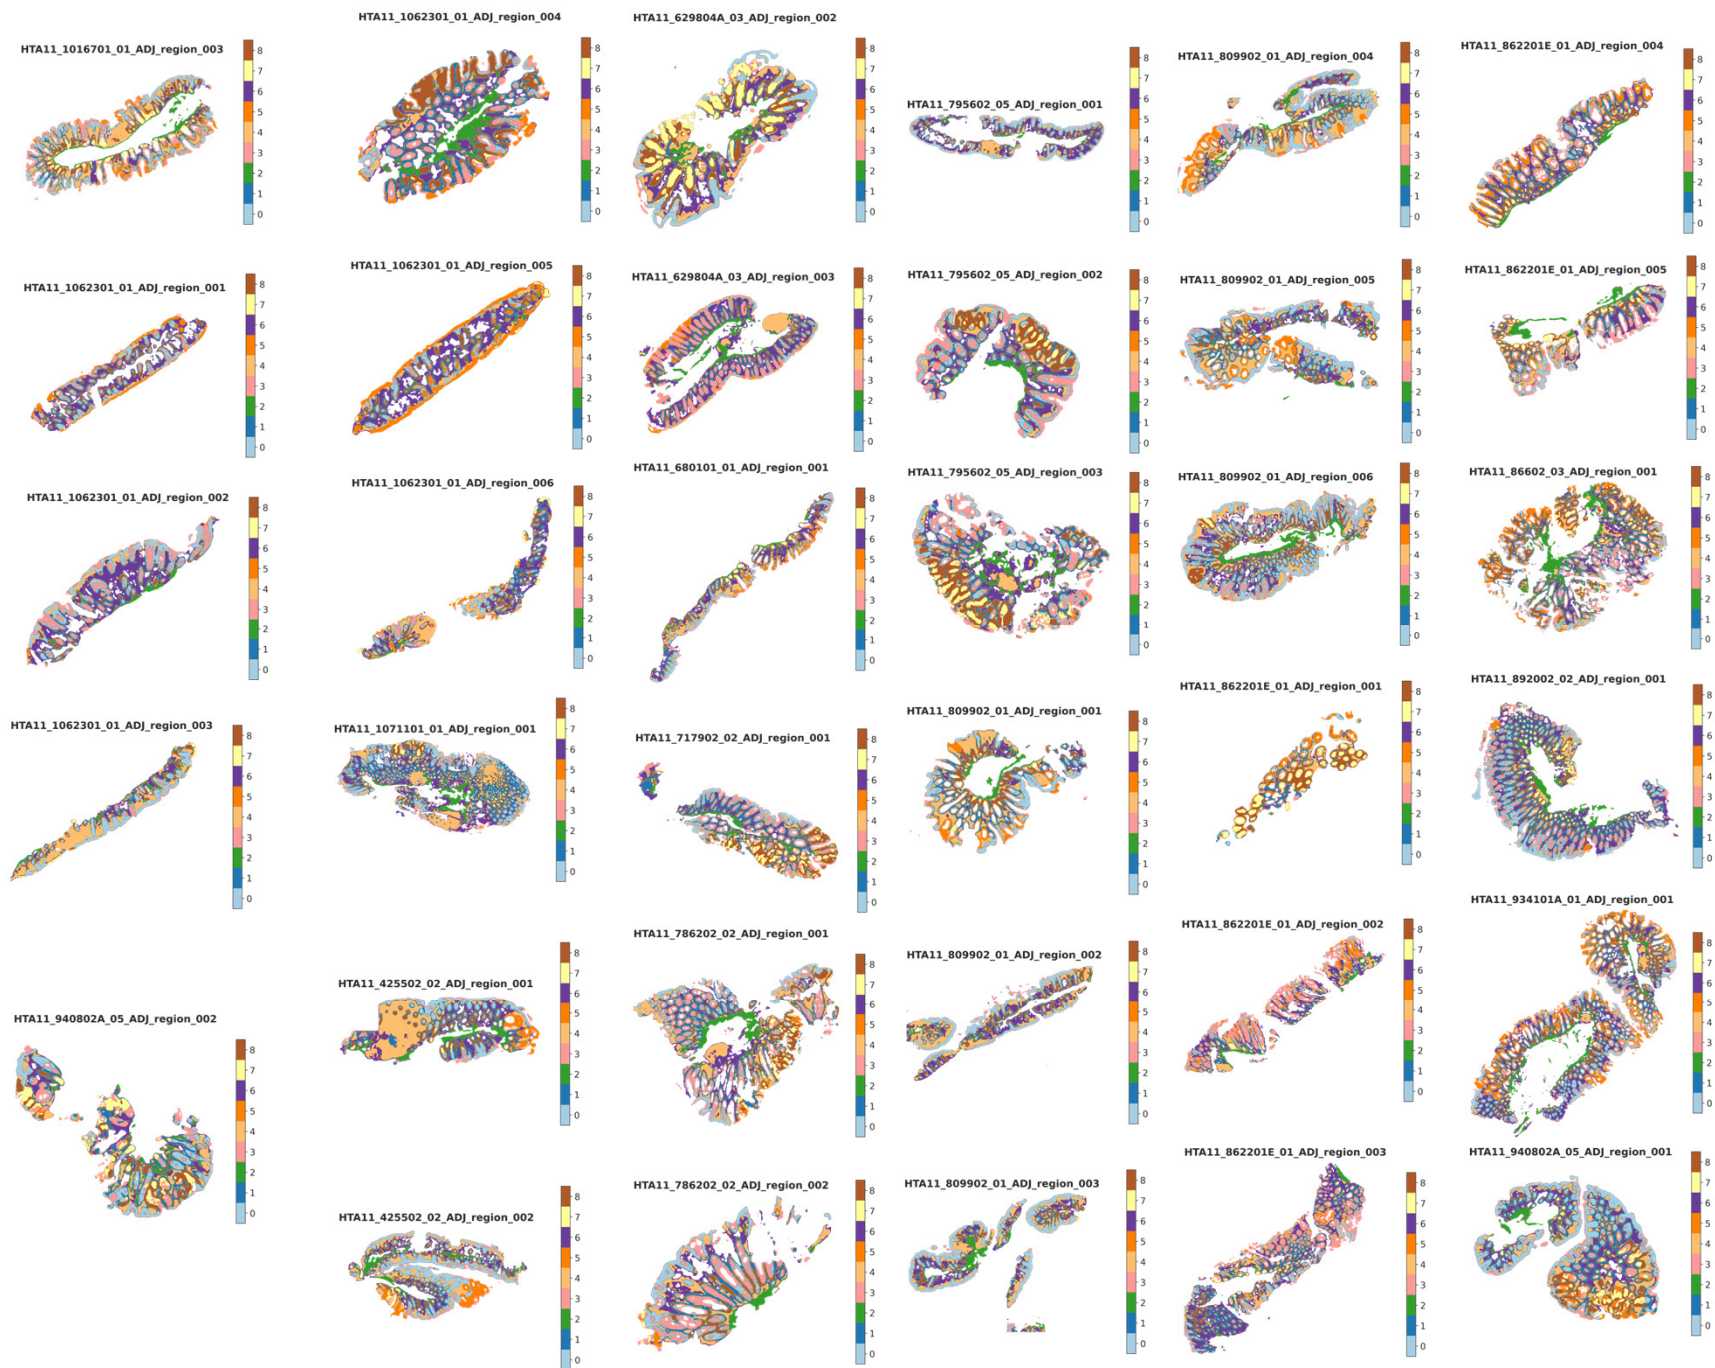

Figure S4. Tissue domain labels for human colonic samples ( $\alpha = 0.02$ ). Tissue domains for all the colonic samples ( $\alpha = 0.02$ ).

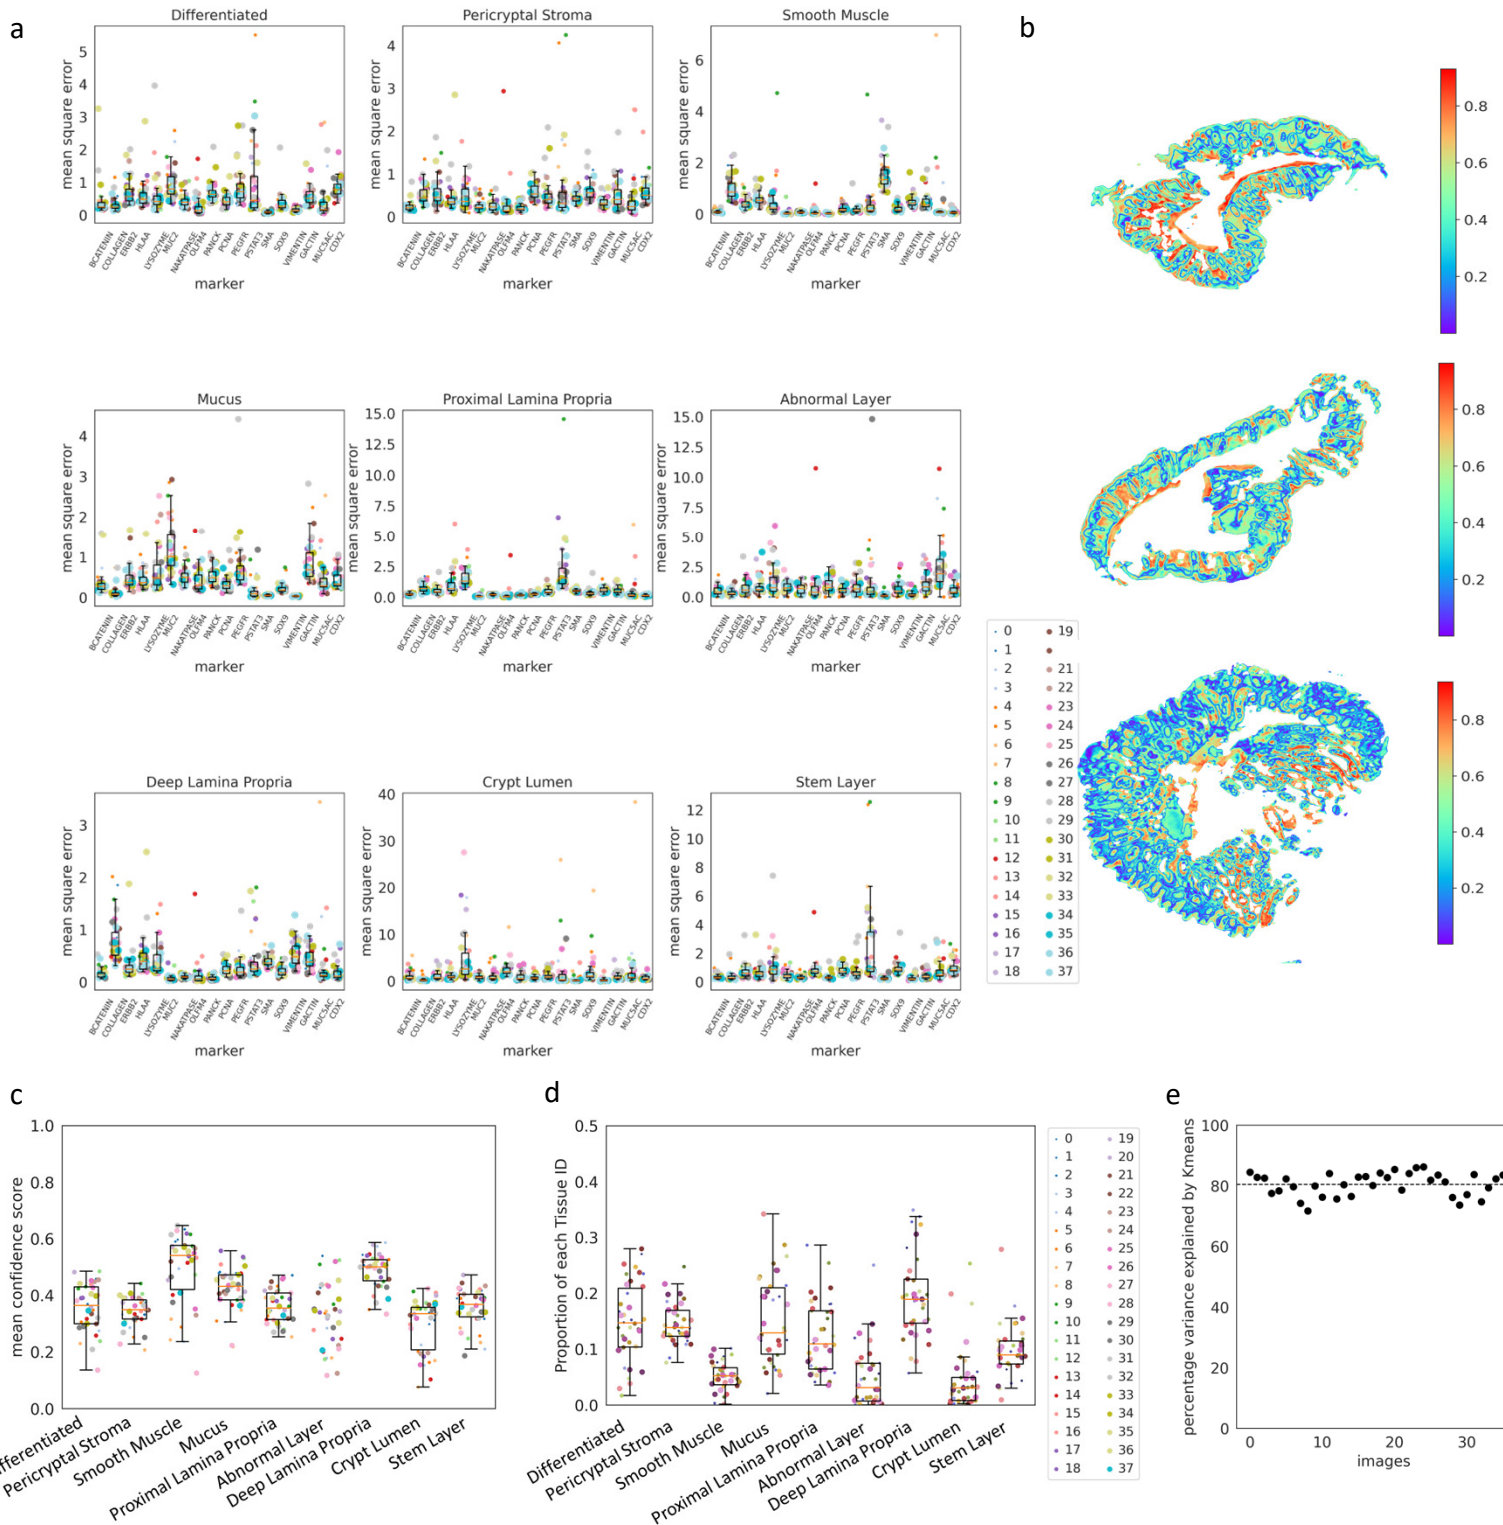

**Figure S5. MILWRM QC metrics on colonic precancer specimens.** (a) Boxplot for mean square error within each tissue domain for each marker. Mean square error is average of Euclidean distance between each pixel intensity of that marker and  $k$ -means centroid for that tissue domain. Colored dots represent a sample. (b) Confidence scores overlaid on three representative tissues. (c) Boxplot for average confidence score across all pixels in each image for each tissue domain with each color dot corresponding to a sample (legend on the right). (d) Boxplot for proportion of each tissue domain across 38 samples with each colored dot corresponding to a sample (legend on the right). (e) Scatter plot for percentage variance explained by the  $k$ -means model over 38 samples with each dot corresponding to a sample; dotted line is mean variance explained across all samples.

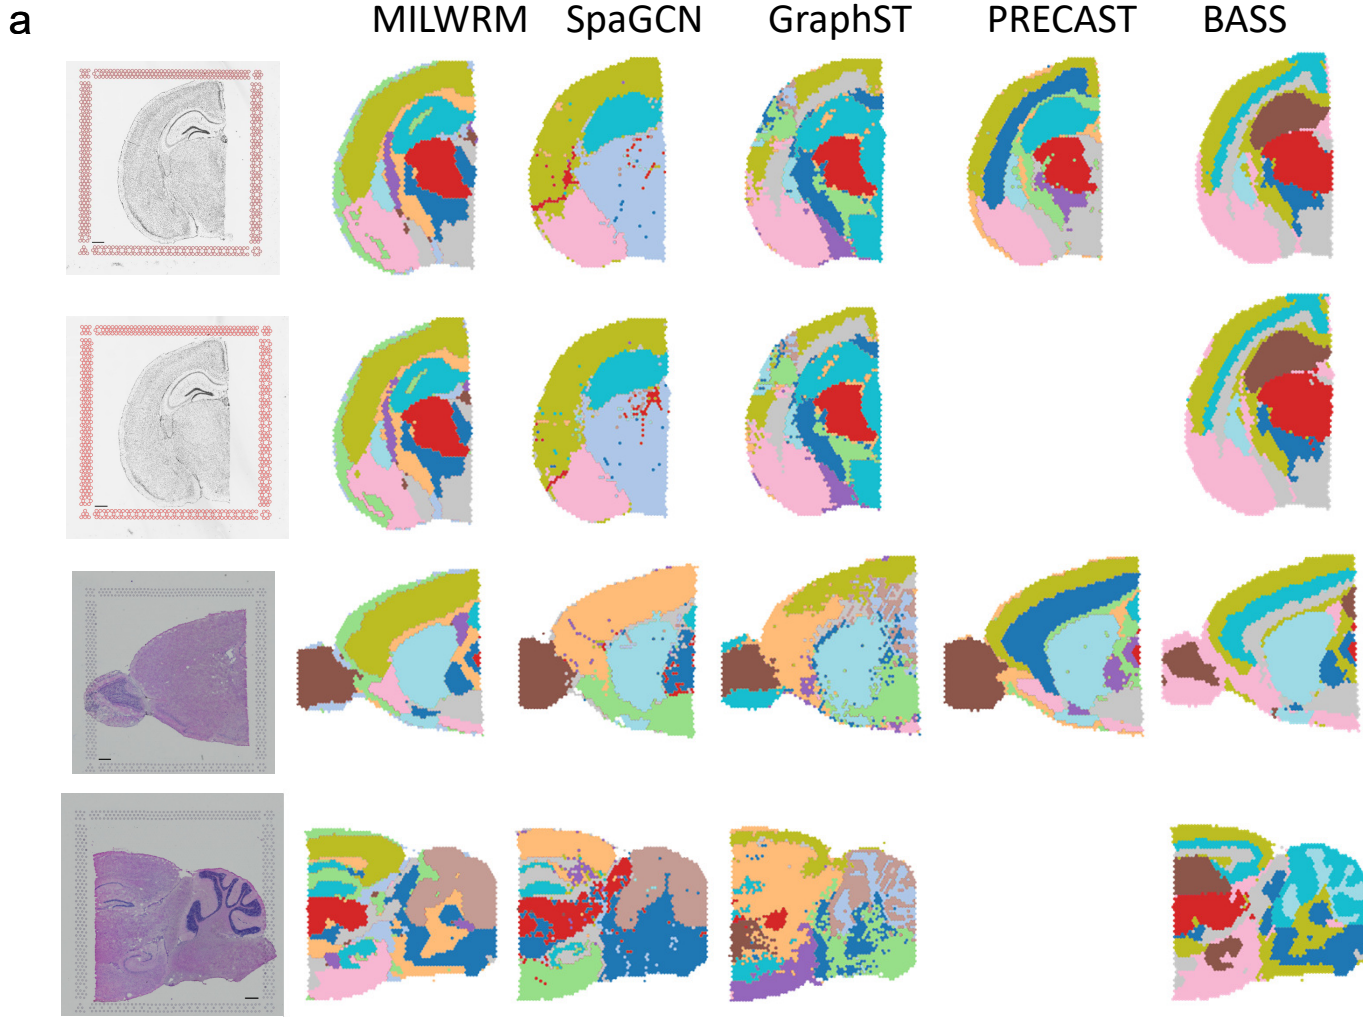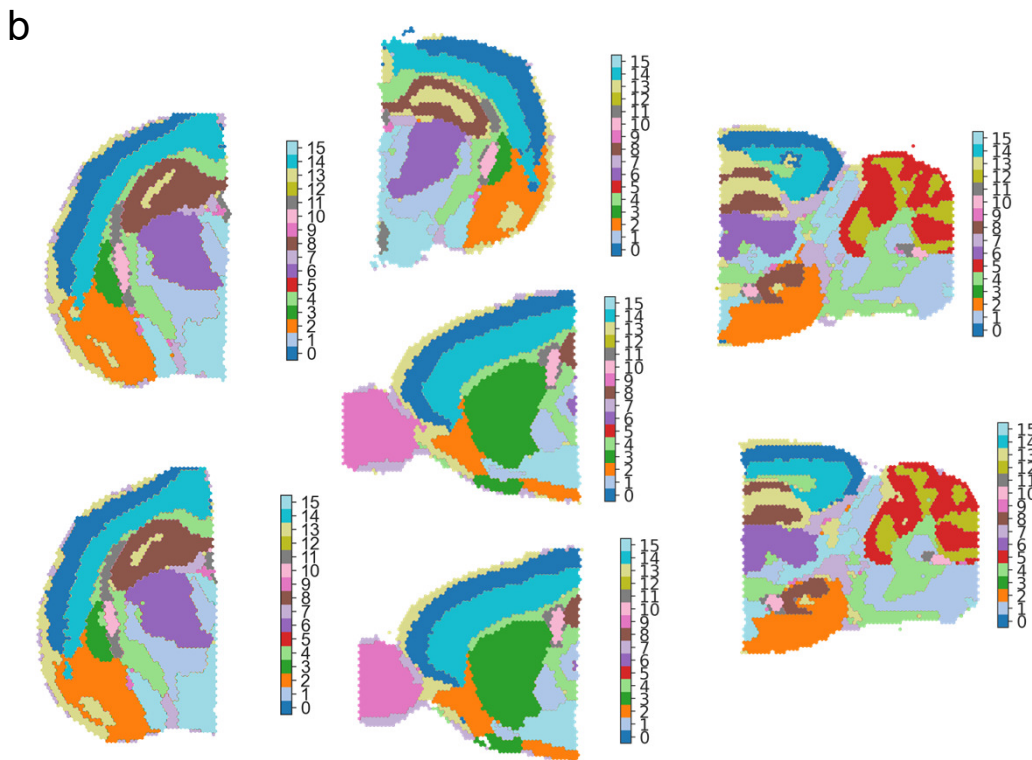

**Figure S6. Tissue domains for remaining mouse brain samples and MILWRM at higher resolution on mouse brain.** (a) MILWRM, SpaGCN, GraphST, PRECAST and BASS detected tissue domains ( $k = 13$ ) overlaid on rest of the mouse brain ST samples (scale bar = 500  $\mu\text{m}$ ). (b) MILWRM on mouse brain dataset at higher resolution ( $\alpha = 0.01$ ).

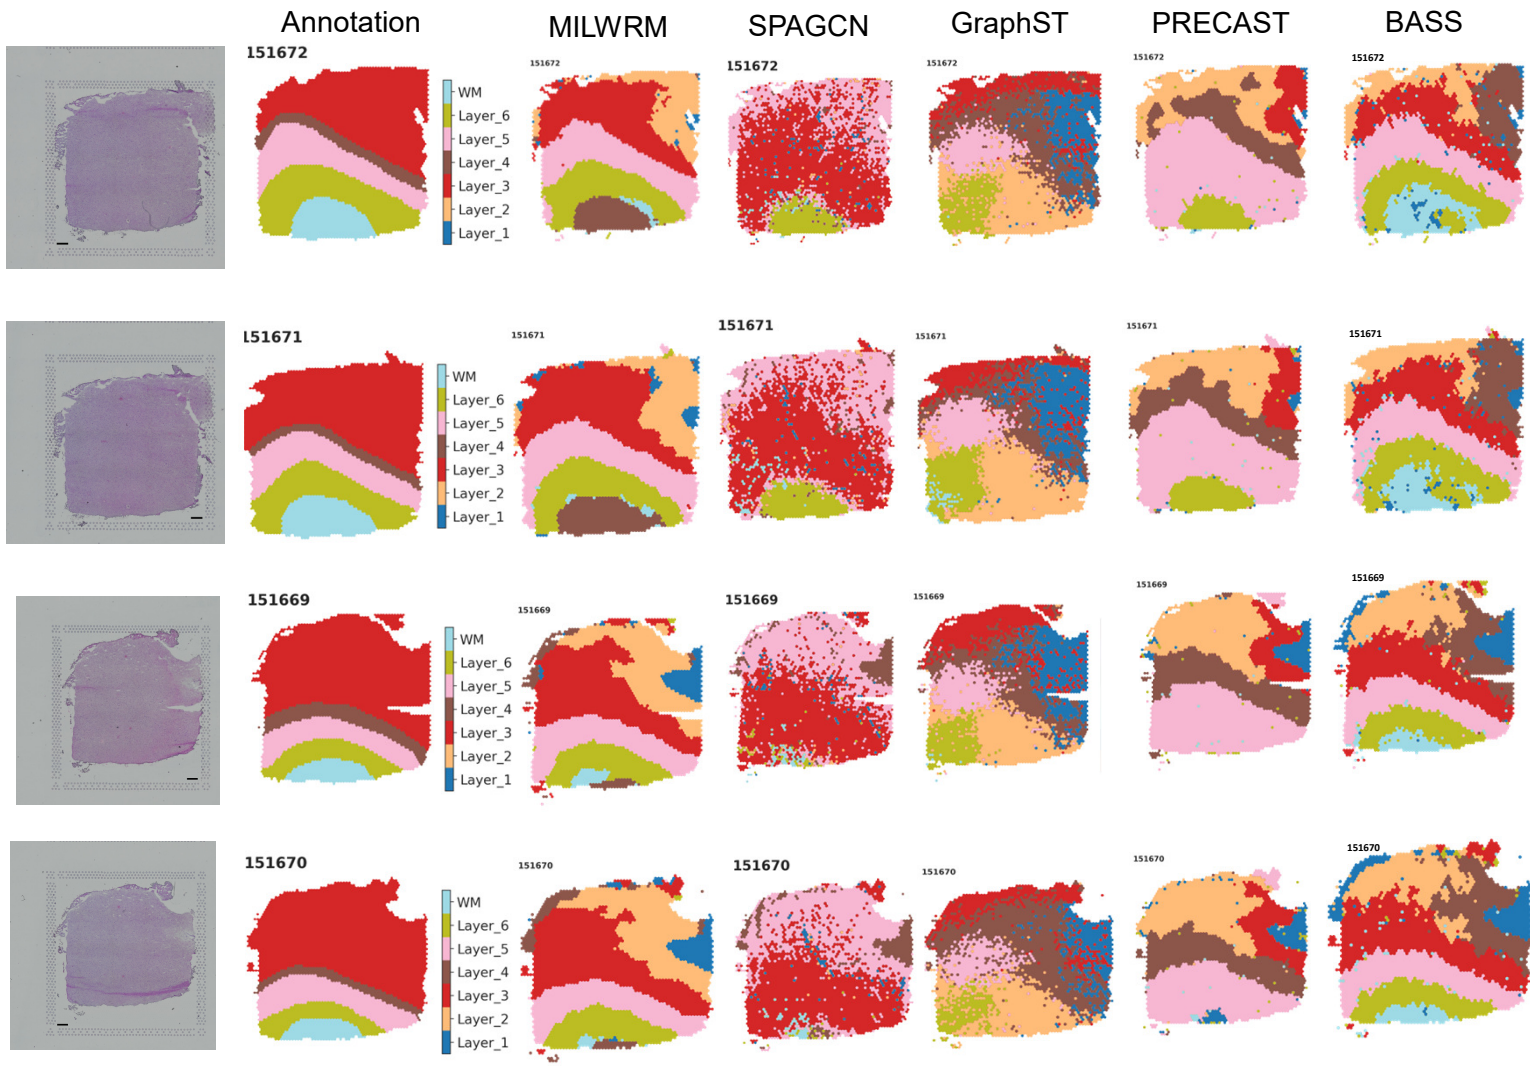

**Figure S7. Tissue domains for DLPFC sections (151669-151672).** MILWRM, SpaGCN, GraphST, PRECAST and BASS detected tissue domains ( $k=7$ ) overlaid on DLPFC specimens (scale bar = 500  $\mu\text{m}$ ).

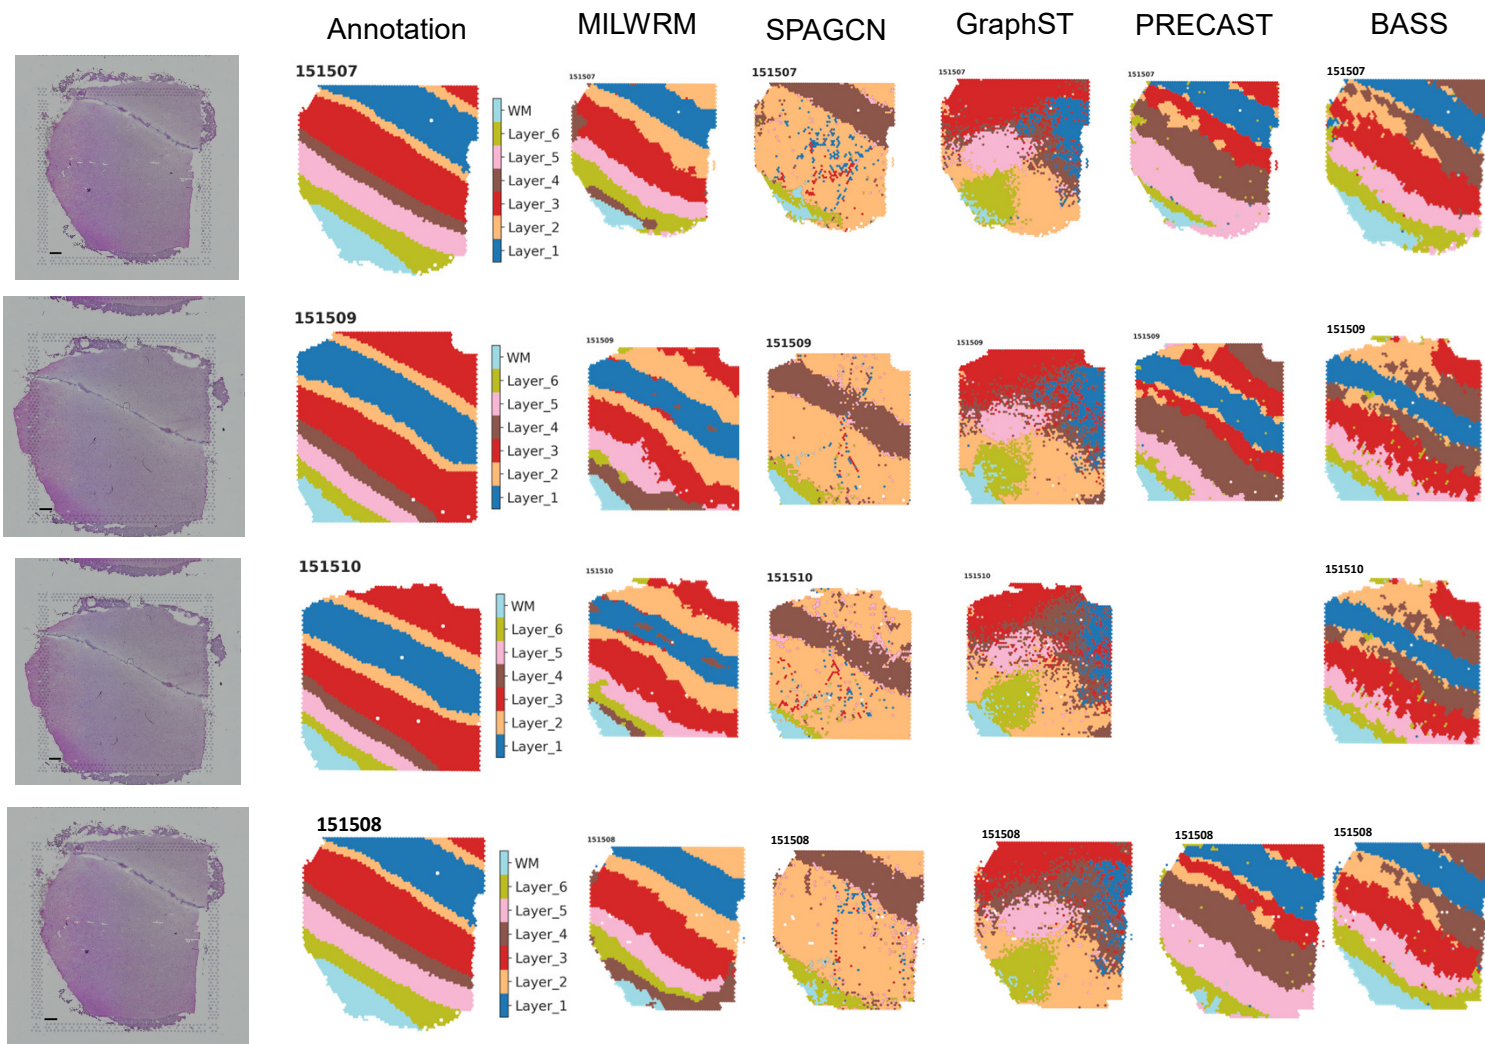

**Figure S8. Tissue domains for DLPFC sections (151507-151510).** MILWRM, SpaGCN, GraphST, PRECAST and BASS detected tissue domains ( $k=7$ ) overlaid on DLPFC specimens. PRECAST caused some unexpected trimming in 151510 (scale bar = 500  $\mu\text{m}$ ).



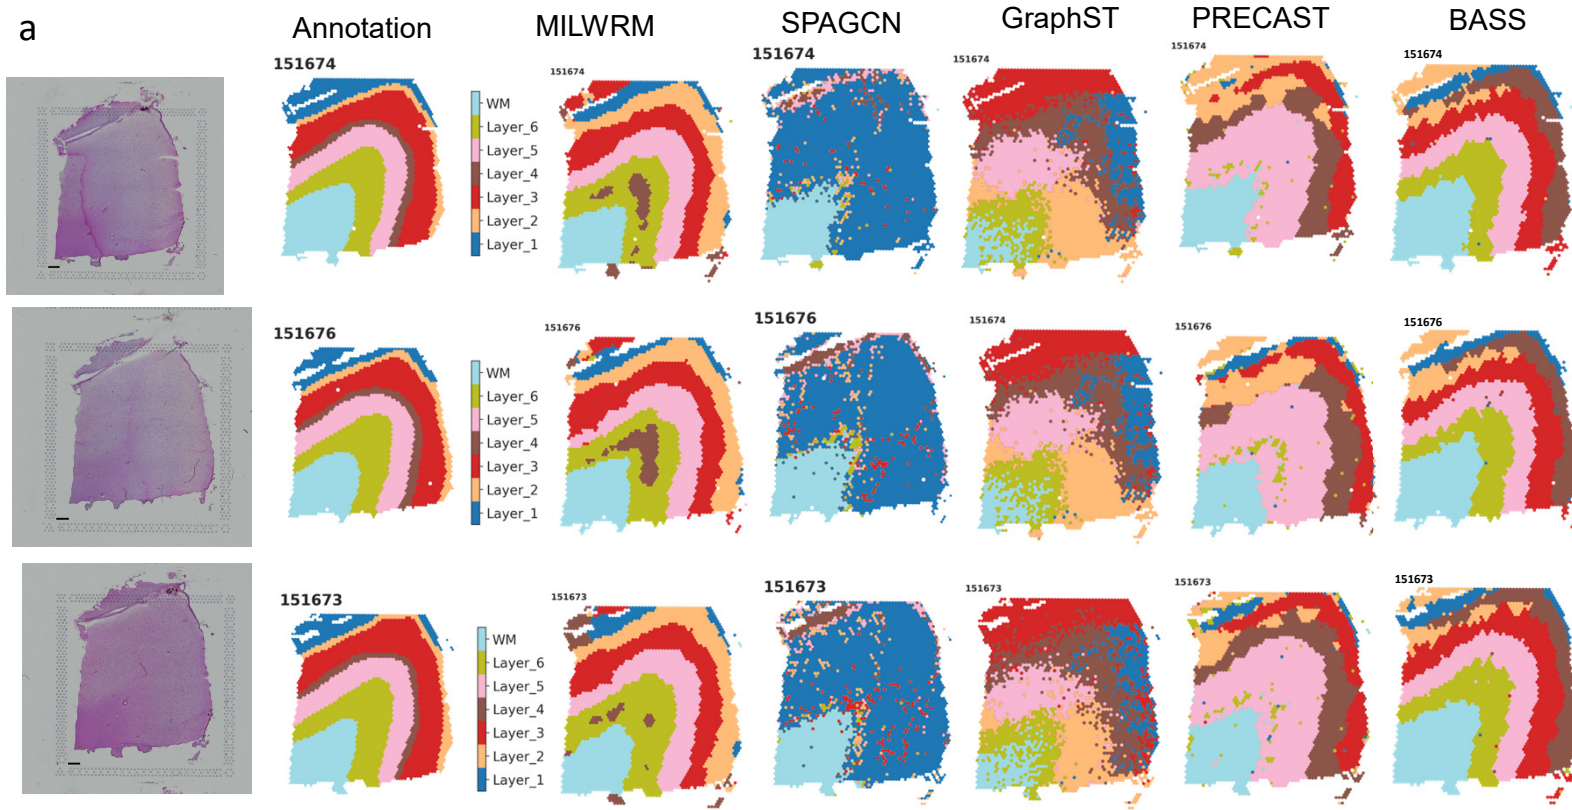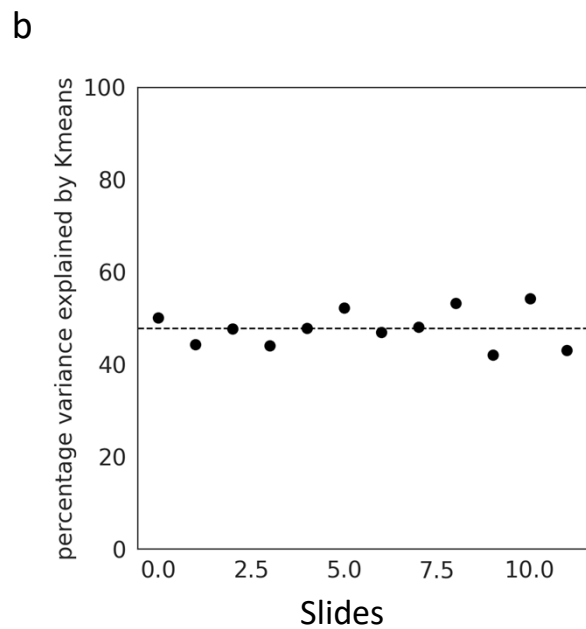

**Figure S9. Tissue domains for DLPFC sections (151673,151674 and 151675).** (a) MILWRM, SpaGCN, GraphST, PRECAST and BASS detected tissue domains ( $k=7$ ) overlaid on DLPFC specimens (scale bar = 500  $\mu$ m). (b) Scatter plot for percentage variance explained by the  $k$ -means model over 12 samples with each dot corresponding to a sample; dotted line is mean variance explained across all samples.

**Supplementary Table 1. Summary table for human colonic sample metadata**

| Batch name             | Slide region                      | Tissue category | Broad precancer type |
|------------------------|-----------------------------------|-----------------|----------------------|
| HTA11_10167_0000_01_01 | HTA11_10167_0000_01_01_region_001 | normal          | SSL                  |
| HTA11_10167_0000_01_01 | HTA11_10167_0000_01_01_region_002 | normal          | SSL                  |
| HTA11_10167_0000_01_01 | HTA11_10167_0000_01_01_region_003 | Tumor           | SSL                  |
| HTA11_10623_0000_01_01 | HTA11_10623_0000_01_01_region_001 | normal          | AD                   |
| HTA11_10623_0000_01_01 | HTA11_10623_0000_01_01_region_002 | normal          | AD                   |
| HTA11_10623_0000_01_01 | HTA11_10623_0000_01_01_region_003 | normal          | AD                   |
| HTA11_10623_0000_01_01 | HTA11_10623_0000_01_01_region_004 | Tumor           | AD                   |
| HTA11_10623_0000_01_01 | HTA11_10623_0000_01_01_region_005 | normal          | AD                   |
| HTA11_10623_0000_01_01 | HTA11_10623_0000_01_01_region_006 | normal          | AD                   |
| HTA11_10711_0000_01_01 | HTA11_10711_0000_01_01_region_001 | Tumor           | AD                   |
| HTA11_4255_0000_02_02  | HTA11_4255_0000_02_02_region_001  | Tumor           | SSL                  |
| HTA11_4255_0000_02_02  | HTA11_4255_0000_02_02_region_002  | normal          | SSL                  |
| HTA11_6298_0000_04A_03 | HTA11_6298_0000_04A_03_region_001 | Tumor           | AD                   |
| HTA11_6298_0000_04A_03 | HTA11_6298_0000_04A_03_region_002 | Tumor           | AD                   |
| HTA11_6298_0000_04A_03 | HTA11_6298_0000_04A_03_region_003 | normal          | AD                   |
| HTA11_6801_0000_01_01  | HTA11_6801_0000_01_01_region_001  | Tumor           | SSL                  |
| HTA11_7179_0000_02_02  | HTA11_7179_0000_02_02_region_001  | Tumor           | AD                   |
| HTA11_7862_0000_02_02  | HTA11_7862_0000_02_02_region_001  | Tumor           | AD                   |
| HTA11_7862_0000_02_02  | HTA11_7862_0000_02_02_region_002  | normal          | AD                   |
| HTA11_7956_0000_02_05  | HTA11_7956_0000_02_05_region_001  | normal          | SSL                  |
| HTA11_7956_0000_02_05  | HTA11_7956_0000_02_05_region_002  | Tumor           | SSL                  |
| HTA11_7956_0000_02_05  | HTA11_7956_0000_02_05_region_003  | Tumor           | SSL                  |
| HTA11_8099_0000_02_01  | HTA11_8099_0000_02_01_region_001  | normal          | SSL                  |
| HTA11_8099_0000_02_01  | HTA11_8099_0000_02_01_region_002  | normal          | SSL                  |
| HTA11_8099_0000_02_01  | HTA11_8099_0000_02_01_region_003  | normal          | SSL                  |
| HTA11_8099_0000_02_01  | HTA11_8099_0000_02_01_region_004  | normal          | SSL                  |
| HTA11_8099_0000_02_01  | HTA11_8099_0000_02_01_region_005  | Tumor           | SSL                  |
| HTA11_8099_0000_02_01  | HTA11_8099_0000_02_01_region_006  | normal          | SSL                  |
| HTA11_8622_0000_01E_01 | HTA11_8622_0000_01E_01_region_001 | normal          | SSL                  |
| HTA11_8622_0000_01E_01 | HTA11_8622_0000_01E_01_region_002 | Tumor           | SSL                  |
| HTA11_8622_0000_01E_01 | HTA11_8622_0000_01E_01_region_003 | Tumor           | SSL                  |
| HTA11_8622_0000_01E_01 | HTA11_8622_0000_01E_01_region_004 | Tumor           | SSL                  |
| HTA11_8622_0000_01E_01 | HTA11_8622_0000_01E_01_region_005 | normal          | SSL                  |
| HTA11_866_0000_02_03   | HTA11_866_0000_02_03_region_001   | Tumor           | AD                   |
| HTA11_8920_0000_02_02  | HTA11_8920_0000_02_02_region_001  | Tumor           | SSL                  |
| HTA11_9341_0000_01A_01 | HTA11_9341_0000_01A_01_region_001 | Tumor           | SSL                  |
| HTA11_9408_0000_02A_05 | HTA11_9408_0000_02A_05_region_001 | Tumor           | AD                   |
| HTA11_9408_0000_02A_05 | HTA11_9408_0000_02A_05_region_002 | Tumor           | AD                   |

**Supplementary Table 2. Coefficient summary table for association between size of tissue domain and pre-cancer subtype**

| Pixel size of tissue domain  | Estimate  | SE       | Chi-square | p-value | RESI  | p <sub>FDR</sub> |
|------------------------------|-----------|----------|------------|---------|-------|------------------|
| Differentiated tissue domain | 0.412     | 2.12e-01 | 3.774      | 0.052   | 0.430 | 0.130            |
| Pericryptal Stroma           | 0.240     | 1.31e-01 | 3.366      | 0.067   | 0.397 | 0.133            |
| Smooth Muscle                | -0.341    | 2.83e-01 | 1.449      | 0.229   | 0.173 | 0.381            |
| Mucus                        | 0.036     | 1.68e-01 | 0.046      | 0.830   | 0.000 | 0.922            |
| Deep Lamina Propria          | 0.010     | 2.10e-01 | 0.002      | 0.962   | 0.000 | 0.962            |
| Abnormal Layer               | 0.996     | 4.68e-01 | 4.534      | 0.033   | 0.485 | 0.130            |
| Proximal Lamina Propria      | 0.145     | 1.87e-01 | 0.604      | 0.437   | 0.000 | 0.581            |
| Crypt Lumen                  | -1.116    | 5.65e-01 | 3.904      | 0.048   | 0.440 | 0.130            |
| Stem Layer                   | -0.680    | 1.48e-01 | 21.220     | 0.000   | 1.161 | 0.000            |
| Total                        | 50593.575 | 6.92e+04 | 0.535      | 0.464   | 0.000 | 0.581            |

**Supplementary Table 3. Coefficient summary table for association between size of maximum connected component of each tissue domain and pre-cancer type**

| Maximum pixel size of connected components in tissue domain | Estimate | SE    | Chi-square | p-value | RESI  | $p_{FDR}$ |
|-------------------------------------------------------------|----------|-------|------------|---------|-------|-----------|
| Differentiated tissue domain                                | 0.045    | 0.178 | 0.065      | 0.798   | 0.000 | 0.898     |
| Pericryptal Stroma                                          | 0.012    | 0.136 | 0.008      | 0.929   | 0.000 | 0.929     |
| Smooth Muscle                                               | -0.164   | 0.144 | 1.299      | 0.254   | 0.141 | 0.357     |
| Mucus                                                       | 0.535    | 0.105 | 25.849     | 0.000   | 1.287 | 0.000     |
| Deep Lamina Propria                                         | 0.114    | 0.084 | 1.836      | 0.175   | 0.236 | 0.357     |
| Abnormal Layer                                              | 0.275    | 0.254 | 1.177      | 0.278   | 0.109 | 0.357     |
| Proximal Lamina Propria                                     | -0.142   | 0.112 | 1.595      | 0.207   | 0.199 | 0.357     |
| Crypt Lumen                                                 | -0.262   | 0.193 | 1.850      | 0.174   | 0.238 | 0.357     |
| Stem Layer                                                  | -0.435   | 0.175 | 6.164      | 0.013   | 0.587 | 0.059     |
